# Supplementary material
Source: publisher site journal article supplement (https://www.dovepress.com/article/599319)
Supplement: Supplementary file 1 [file 599319_Supplemantary%20appendix%201.docx]

**Supplementary Appendix 1. Complete questionaire used in the study**

Mentoring during specialty training: The trainees' knowledge, opinions, and

Experiences

**A: Demographics:**

1- Choose your year of residency:

a) R1

b) R2

c) R3

d) R4

2- Your Age:

a) 20-25

b) 25-30

c) 30-35

d) 35-40

3- Gender:

a) Male

b) Female

4- Your Residency program:

a) Family medicine

b) Internal medicine

c) General pediatrics

d) Others (please specify)

5- Please indicate if you have a mentor or not (Note: A mentor is someone with experience who

offers you guidance)

a) Yes

b) No

c) Not sure

If you answered Q5: Yes, please fill the whole survey, if No please skip section B questions

**B: Mentorship experience:**

1- How many mentors do you have:

a) One mentor

b) Tow mentors

c) Three mentors

d) More than three mentors.

2- How did you get assigned to your mentor:

a) Formal assignment (assigned to you by your program)

b) Informal assignment (Self assignment)

c) Both (Formal and informal)

3- Your mentor assisted with academic goals:

a) Yes

b) No

4- Your mentor assisted with career opportunities:

a) Yes

b) No

5- Your mentor assisted with personal/family goals:

a) Yes

b) No

6- Your mentor assisted with Financial goals:

a) Yes

b) No

7- Do you think your mentorship relationships are beneficial?

a) Strongly agree

b) Agree

c) Neither agree nor disagree

d) Disagree

e) Strongly disagree

**C: Challenges and barriers for having a mentor and effective mentorships:**

1) Lack of skilled mentors:

a) Strongly agree

b) Agree

c) Neither agree nor disagree

d) Disagree

e) Strongly disagree

2) Insufficient time available for mentorship:

a) Strongly agree

b) Agree

c) Neither agree nor disagree

d) Disagree

e) Strongly disagree

3) Lack of financial compensation for mentors:

a) Strongly agree

b) Agree

c) Neither agree nor disagree

d) Disagree

e) Strongly disagree

4) Lack of mentors of the same gender:

a) Strongly agree

b) Agree

c) Neither agree nor disagree

d) Disagree

e) Strongly disagree

5) Lack of mentors of the same background:

a) Strongly agree

b) Agree

c) Neither agree nor disagree

d) Disagree

e) Strongly disagree

6) Mentorship programs without formalized meeting times:

a) Strongly agree

b) Agree

c) Neither agree nor disagree

d) Disagree

e) Strongly disagree

7) Mentorship programs without formalized objectives:

a) Strongly agree

b) Agree

c) Neither agree nor disagree

d) Disagree

e) Strongly disagree

8) Lack of a personal connection between mentor and mentee:

a) Strongly agree

b) Agree

c) Neither agree nor disagree

d) Disagree

e) Strongly disagree

9) Lack of mentors who have similar personal and professional goals:

a) Strongly agree

b) Agree

c) Neither agree nor disagree

d) Disagree

e) Strongly disagree

**D: Knowledge and perspectives:**

Mentorship in residency is important for:

1) Successful career advancement:

a) Strongly agree

b) Agree

c) Neither agree nor disagree

d) Disagree

e) Strongly disagree

2) Increasing academic productivity:

a) Strongly agree

b) Agree

c) Neither agree nor disagree

d) Disagree

e) Strongly disagree

3) Increasing grant funding:

a) Strongly agree

b) Agree

c) Neither agree nor disagree

d) Disagree

e) Strongly disagree

4) Increasing personal productivity:

a) Strongly agree

b) Agree

c) Neither agree nor disagree

d) Disagree

e) Strongly disagree

5) Clinical skills development:

a) Strongly agree

b) Agree

c) Neither agree nor disagree

d) Disagree

e) Strongly disagree

6) Faculty retention:

a) Strongly agree

b) Agree

c) Neither agree nor disagree

d) Disagree

e) Strongly disagree

7) Fostering teaching skills:

a) Strongly agree

b) Agree

c) Neither agree nor disagree

d) Disagree

e) Strongly disagree

8) Building confidence:

a) Strongly agree

b) Agree

c) Neither agree nor disagree

d) Disagree

e) Strongly disagree

**D: Your Opinion about mentorship:**

1) During residency, do you believe a mentorship program could help to improve overall success?

a) Strongly agree

b) Agree

c) Neither agree nor disagree

d) Disagree

e) Strongly disagree

2) Which mentorship matching strategy do you prefer?

a) Formal (Your program chose your mentor)

b) Informal (You chode your mentor)

c) Not sure

3) Do you prefer a mentor from same gender?

a) Yes

b) No

c) Not sure
